# Supplementary material for: Magnetic enhanced high-efficiency electromagnetic wave absorbing MXene/Fe3O4 composite absorbers at 2–40 GHz
Source: Royal Society of Chemistry journal article supplement (doi:10.1039/d2tc05150h), 2023-01-01
Supplement: d2tc05150h1.pdf [file d2tc05150h1.pdf]

### Electronic Supplementary Information

#### The magnetic enhanced high-efficiency electromagnetic wave absorbing MXene/Fe<sub>3</sub>O<sub>4</sub> composite absorber in 2-40 GHz

Yan Wang<sup>a</sup>, Haiyan Zhang<sup>\*a</sup>, Qibai Wu<sup>a</sup>, Shengkai Li<sup>a</sup>, Heng Gao<sup>a</sup>, Baoshan Wan<sup>a</sup>,  
Daofeng Wen<sup>a</sup>, Guoxun Zeng<sup>a</sup>.

<sup>a</sup> School of Materials and Energy, Guangdong University of Technology, Guangzhou,  
510006, P. R. China. E-mail: [hyzhang@gdut.edu.cn](mailto:hyzhang@gdut.edu.cn)

\* Corresponding author, E-mail: [hyzhang@gdut.edu.cn](mailto:hyzhang@gdut.edu.cn)

**Table S1** The magnetic parameters for the MF composites.

| Sample  | Ms/(emu/g) | Hc/(Oe) |
|---------|------------|---------|
| MF-0    | 69.50      | 6.61    |
| MF-0.5  | 60.92      | 11.40   |
| MF-0.75 | 50.55      | 32.15   |
| MF-1.5  | 37.67      | 12.08   |

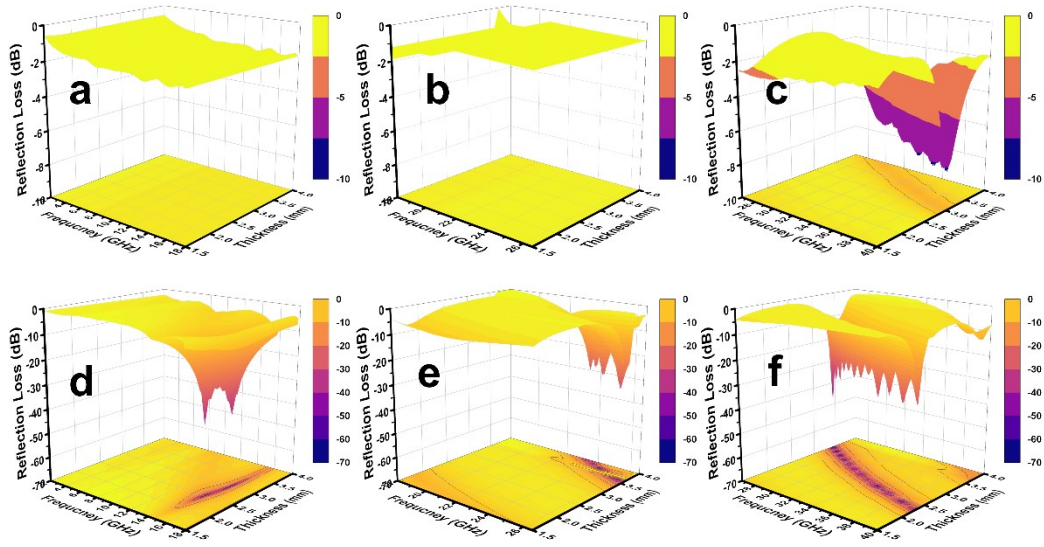

**Fig. S1** The 3D color mapping surface diagram with the projection of RL of MXene (a-c), and MF-0 (d-f) in 2-40 GHz.

**Table S2** EMW absorption performance of the MF composites.

|                | Samples | RL <sub>min</sub><br>(dB) | Relative<br>frequency<br>(GHz) | EAB<br>(GHz) | Thickness<br>(mm) |
|----------------|---------|---------------------------|--------------------------------|--------------|-------------------|
| 2-18<br>GHz    | MF-0.5  | -60.2                     | 6.57                           | 3.10         | 3.4               |
|                | MF-0.75 | -56.4                     | 12.78                          | 3.10         | 1.6               |
|                | MF-1.5  | -66.3                     | 6.53                           | 2.48         | 3.4               |
| 18-26.5<br>GHz | MF-0.5  | -32.4                     | 23.36                          | 3.09         | 4.0               |
|                | MF-0.75 | -46.5                     | 19.47                          | 1.45         | 2.2               |
|                | MF-1.5  | -23.5                     | 21.08                          | 1.57         | 3.0               |
| 26.5-40<br>GHz | MF-0.5  | -65.5                     | 36.95                          | 2.30         | 2.4               |
|                | MF-0.75 | -41.7                     | 28.83                          | 2.30         | 2.0               |
|                | MF-1.5  | -41.4                     | 30.42                          | 2.63         | 2.0               |

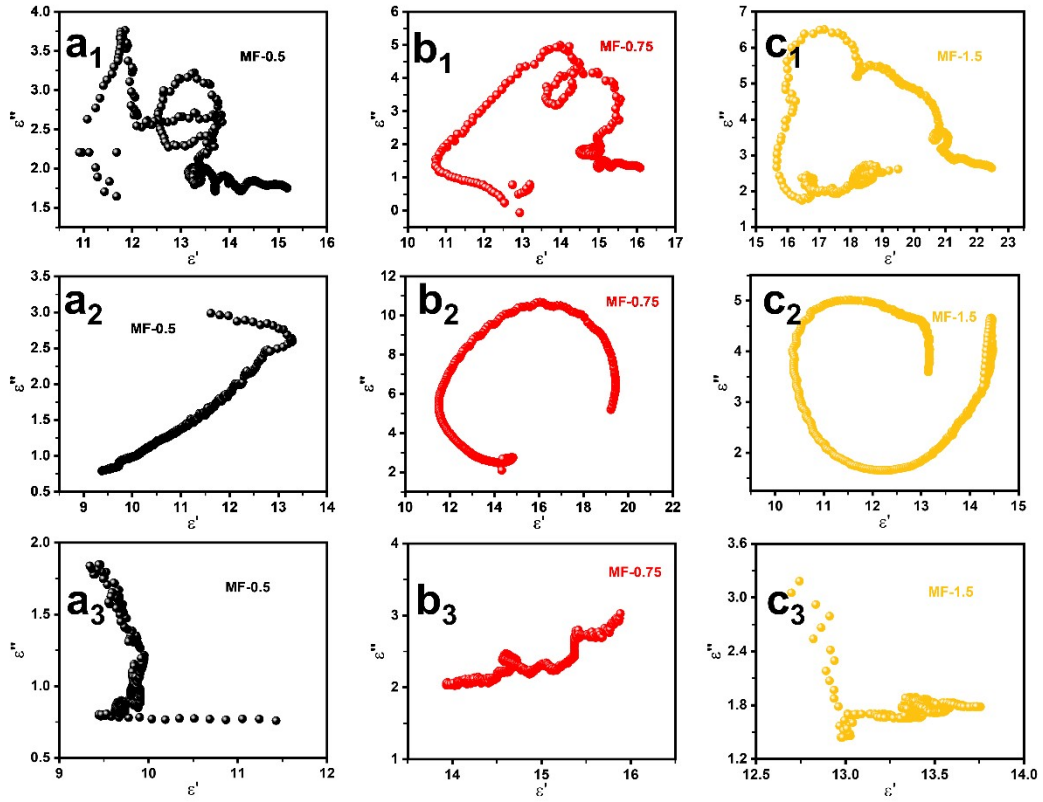

**Fig. S2** Cole-Cole semicircles ( $\epsilon'$  versus  $\epsilon''$ ) of MF composites in 2-18 GHz ( $a_1$ - $c_1$ );  
 18-26.5 GHz ( $a_2$ - $c_2$ ); 26.5-40 GHz ( $a_3$ - $c_3$ ).

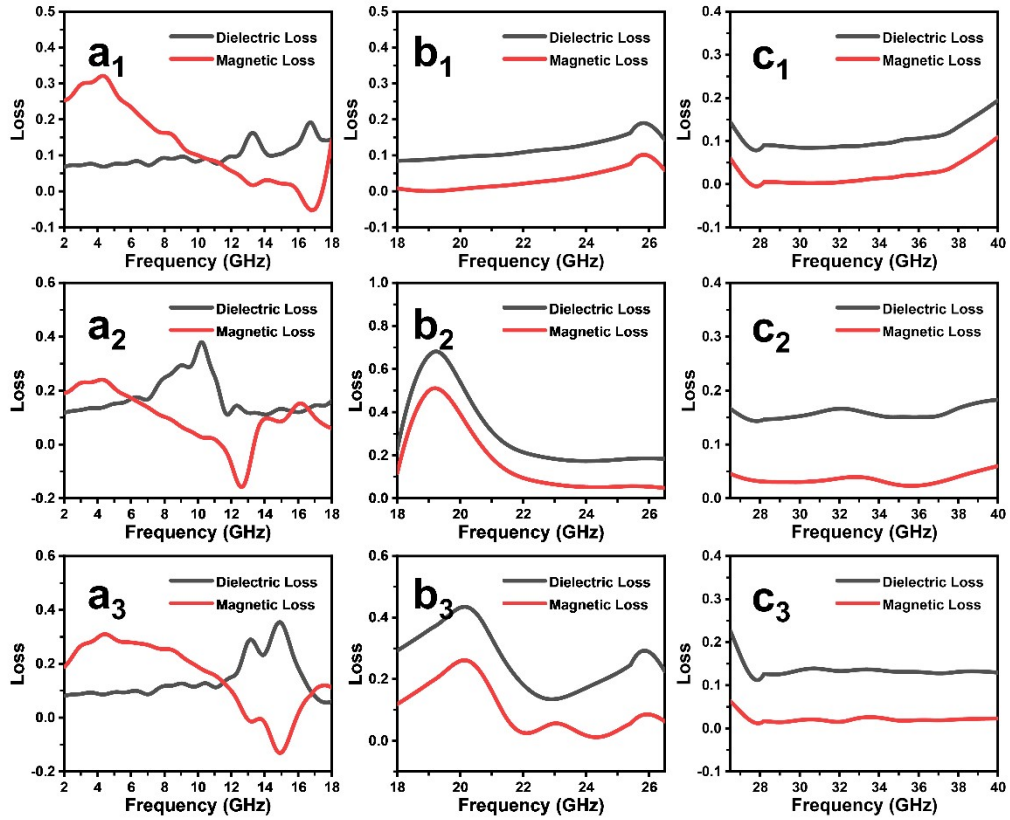

**Fig. S3** Loss mechanism of MF-0.5 in 2-18 GHz ( $a_1$ - $a_3$ ); loss mechanism of MF-0.75 in 18-26.5 GHz ( $b_1$ - $b_3$ ); loss mechanism of MF-1.5 in 26.5-40 GHz ( $c_1$ - $c_3$ ).

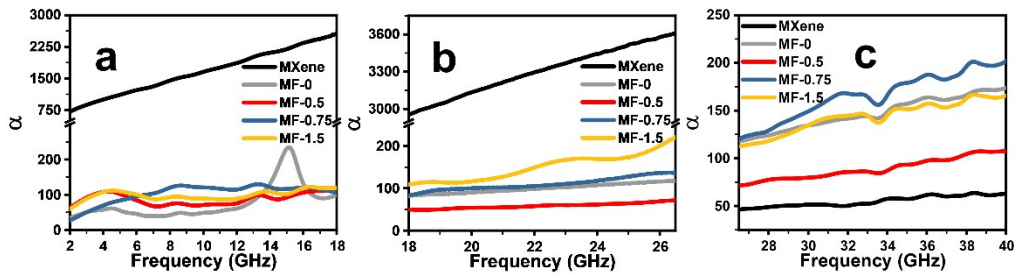

**Fig. S4** Attenuation constants ( $\alpha$ ) of MXene and MF composites in 2-18 GHz (a), 18-26.5 GHz (b), and 26.5-40 GHz (c).
